# Supplementary material
Source: PubMed Central journal article supplement (PMC4911870)
Supplement: jcav07p1044s1.pdf [file jcav07p1044s1.pdf]

Supplemental Table 1. The Gene List for the Ion Torrent AmpliSeq Cancer Panel (A) and List of customized NanoString CNV codeset (B)

(A)

|                                                                                                                                                                                                                                                             |
|-------------------------------------------------------------------------------------------------------------------------------------------------------------------------------------------------------------------------------------------------------------|
| BRAF HRAS KRAS NRAS FGFR1 ERBB2 MET FGFR3 PDGFRA PIK3CA FLT3 RB1<br>CSF1R RET SMARCB1 KIT SRC PTEN CTNNB1 EGFR TP53 CDKN2A ABL1 JAK2<br>NOTCH1 ATM ERBB4 STK11 PTPN11 APC SMO SMAD4 VHL NPM1 MPL CDH1 KDR<br>HNF1A FBXW7 MLH1 GNAS ALK IDH1 JAK3 FGFR2 AKT1 |
|-------------------------------------------------------------------------------------------------------------------------------------------------------------------------------------------------------------------------------------------------------------|

(B)

| NanoString CNV codeset |              |                         |
|------------------------|--------------|-------------------------|
| Gene Name              | Genome Build | Genomic Coordinates     |
| CCND1                  | Hg18         | chr11:69166461-69166560 |
| CCND1                  | Hg18         | chr11:69170198-69170280 |
| CCND1                  | Hg18         | chr11:69173802-69173877 |
| CCNE1                  | Hg18         | chr19:34996365-34996462 |
| CCNE1                  | Hg18         | chr19:35000303-35000396 |
| CCNE1                  | Hg18         | chr19:35005181-35005262 |
| KRAS                   | Hg18         | chr12:25261832-25261919 |
| KRAS                   | Hg18         | chr12:25275152-25275241 |
| KRAS                   | Hg18         | chr12:25285835-25285922 |

|        |      |                           |
|--------|------|---------------------------|
| PIK3CA | Hg18 | chr3:180415123-180415222  |
| PIK3CA | Hg18 | chr3:180423950-180424049  |
| PIK3CA | Hg18 | chr3:180432391-180432478  |
| MET    | Hg18 | chr7:116136002-116136089  |
| MET    | Hg18 | chr7:116160904-116161003  |
| MET    | Hg18 | chr7:116214262-116214361  |
| FGFR1  | Hg18 | chr8:38393783-38393874    |
| FGFR1  | Hg18 | chr8:38413246-38413333    |
| FGFR1  | Hg18 | chr8:38432656-38432745    |
| FGFR2  | Hg18 | chr10:123248163-123248262 |
| FGFR2  | Hg18 | chr10:123290793-123290892 |
| FGFR2  | Hg18 | chr10:123325834-123325907 |
| MDM2   | Hg18 | chr12:67498111-67498194   |
| MDM2   | Hg18 | chr12:67504615-67504714   |
| MDM2   | Hg18 | chr12:67518205-67518304   |
| AURKA  | Hg18 | chr20:54380758-54380852   |
| AURKA  | Hg18 | chr20:54387730-54387829   |
| AURKA  | Hg18 | chr20:54395073-54395172   |
| CDK4   | Hg18 | chr12:56428625-56428714   |
| CDK4   | Hg18 | chr12:56430637-56430731   |
| CDK4   | Hg18 | chr12:56430858-56430945   |
| CDK6   | Hg18 | chr7:92102617-92102714    |
| CDK6   | Hg18 | chr7:92192438-92192525    |
| CDK6   | Hg18 | chr7:92279486-92279585    |
| CDKN1A | Hg18 | chr6:36760296-36760371    |
| CDKN1A | Hg18 | chr6:36760902-36760995    |
| CDKN1A | Hg18 | chr6:36761312-36761391    |
| CDKN2A | Hg18 | chr9:21963369-21963468    |
| CDKN2A | Hg18 | chr9:21964186-21964285    |
| CDKN2A | Hg18 | chr9:21965829-21965928    |
| EGFR   | Hg18 | chr7:55072102-55072181    |
| EGFR   | Hg18 | chr7:55130363-55130434    |
| EGFR   | Hg18 | chr7:55188580-55188673    |
| ERBB2  | Hg18 | chr17:35112859-35112934   |
| ERBB2  | Hg18 | chr17:35124948-35125029   |
| ERBB2  | Hg18 | chr17:35135268-35135347   |
| ERBB3  | Hg18 | chr12:54764300-54764394   |
| ERBB3  | Hg18 | chr12:54771042-54771141   |
| ERBB3  | Hg18 | chr12:54778487-54778586   |

|       |      |                          |
|-------|------|--------------------------|
| IGF1R | Hg18 | chr15:97040030-97040129  |
| IGF1R | Hg18 | chr15:97164717-97164804  |
| IGF1R | Hg18 | chr15:97284983-97285082  |
| KLF5  | Hg18 | chr13:72534198-72534277  |
| KLF5  | Hg18 | chr13:72539794-72539893  |
| KLF5  | Hg18 | chr13:72546812-72546911  |
| MITF  | Hg18 | chr3:69914121-69914220   |
| MITF  | Hg18 | chr3:69997161-69997260   |
| MITF  | Hg18 | chr3:70077697-70077786   |
| MYC   | Hg18 | chr8:128818714-128818790 |
| MYC   | Hg18 | chr8:128820773-128820868 |
| MYC   | Hg18 | chr8:128821228-128821321 |
| TNIK  | Hg18 | chr3:172563186-172563285 |
| TNIK  | Hg18 | chr3:172603694-172603790 |
| TNIK  | Hg18 | chr3:172643608-172643707 |

---
